# Supplementary material for: Monitoring how the metabolic behavior of mycoplasmas is affected by the nutrients: a proof-of-concept demonstration on Mycoplasma gallisepticum by DART-HRMS
Source: Research Square preprint supplement (doi:10.21203/rs.3.rs-7301815/v1), 2025-08-28
Supplement: Supplementary file 1 [file e5ffee16091d3cb942f7f790.docx]

# **Monitoring how the metabolic behavior of mycoplasma is affected by the nutrients: a proof-of-concept demonstration on *Mycoplasma gallisepticum* by DART-HRMS**

Marco Bottinelli1$, Carmela Zacometti2$, Andrea Massaro2, Annalucia Tondo1, Davide Prataviera1, Beatrice Colò1, Micaela Picchi1, Miklós Gyuranecz3, Roberto Piro2, Alessandra Tata2*, Salvatore Catania1.

1Mycoplasma Unit, WOAH Reference Laboratory for Avian Mycoplasmosis (*M. gallisepticum*, *M. synoviae*), SCT-1 Verona, Istituto Zooprofilattico Sperimentale delle Venezie, Buttapietra, Italy.

2Laboratorio di Chimica Sperimentale, SCT-3 Vicenza, Istituto Zooprofilattico Sperimentale delle Venezie, Vicenza, Italy.

3HUN-REN Veterinary Medical Research Institute, Budapest, Hungary

*Corresponding author: Alessandra Tata

email: [atata@izsvenezie.it](mailto:atata@izsvenezie.it)

$ These authors contributed equally to the work.

**Supplementary material**


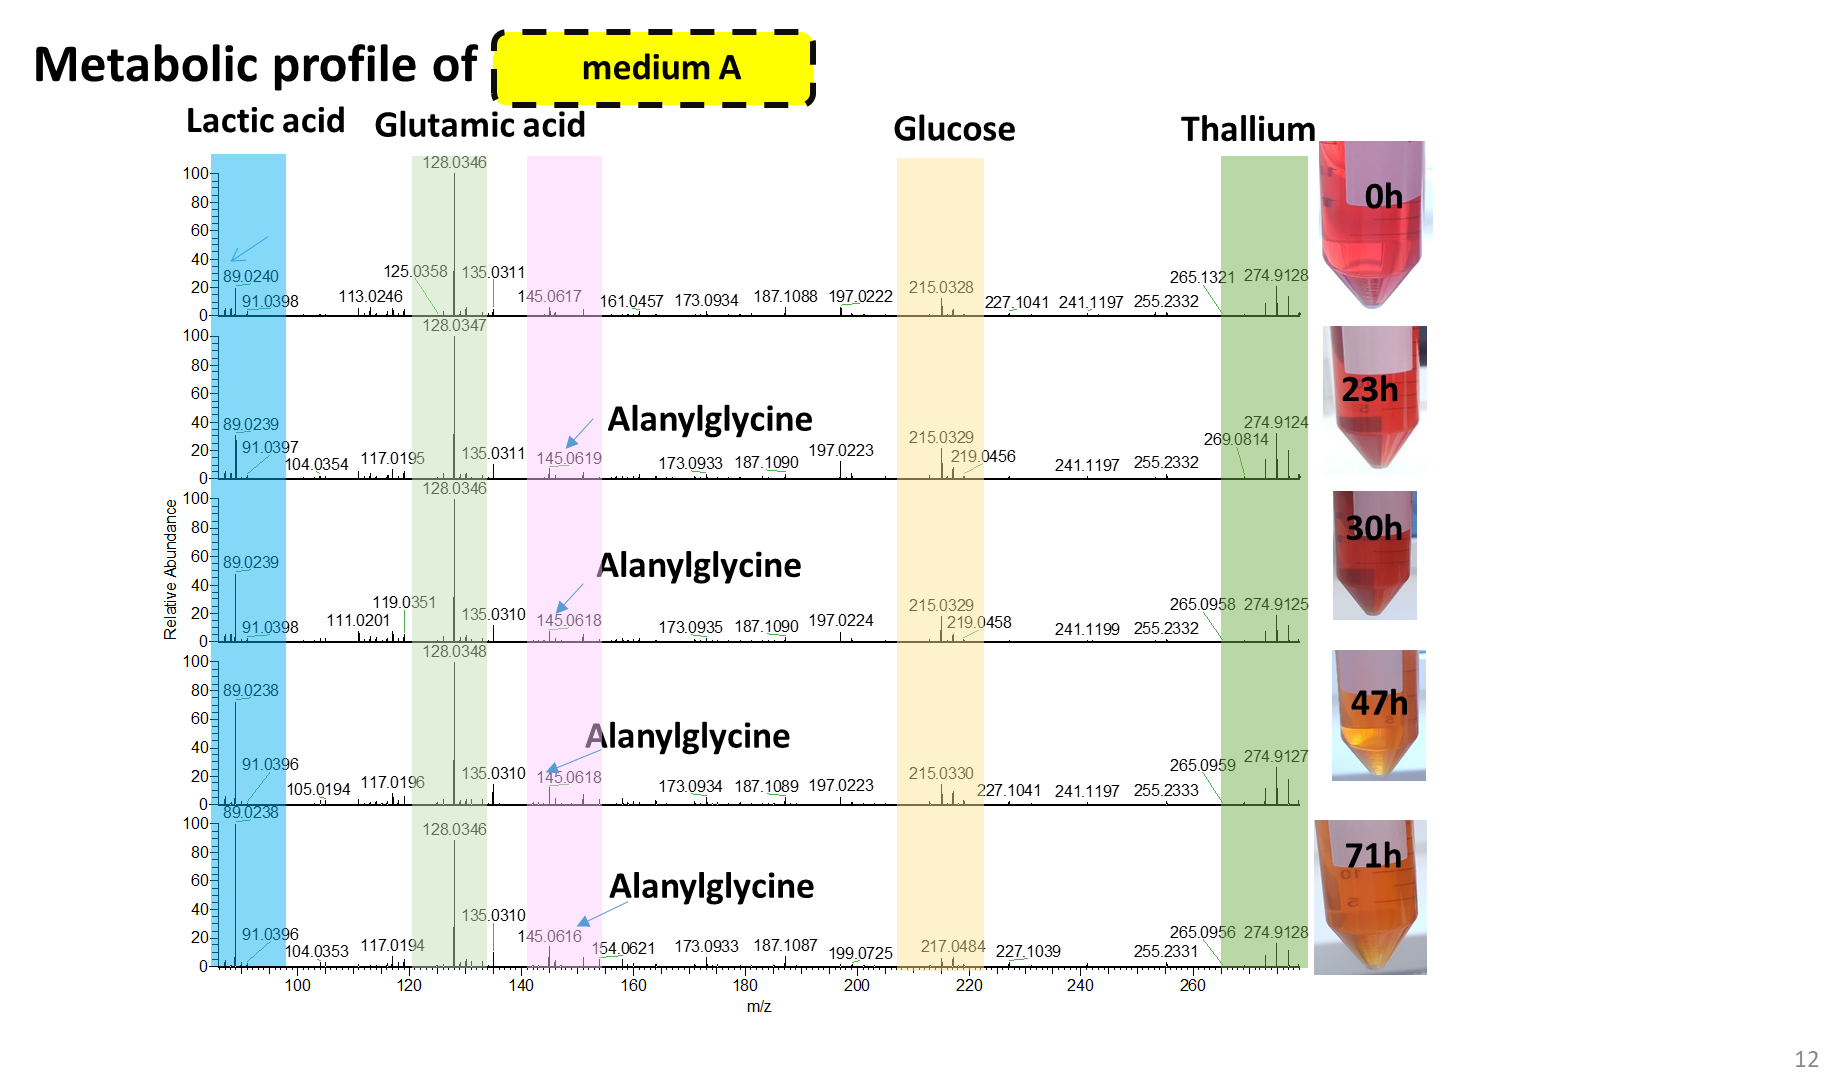


**Figure S1. Representative spectra showing the changes of metabolic fingerprinting of *M. gallisepticum* growing in medium A within 71 hours. Negative ion mode data.**

**
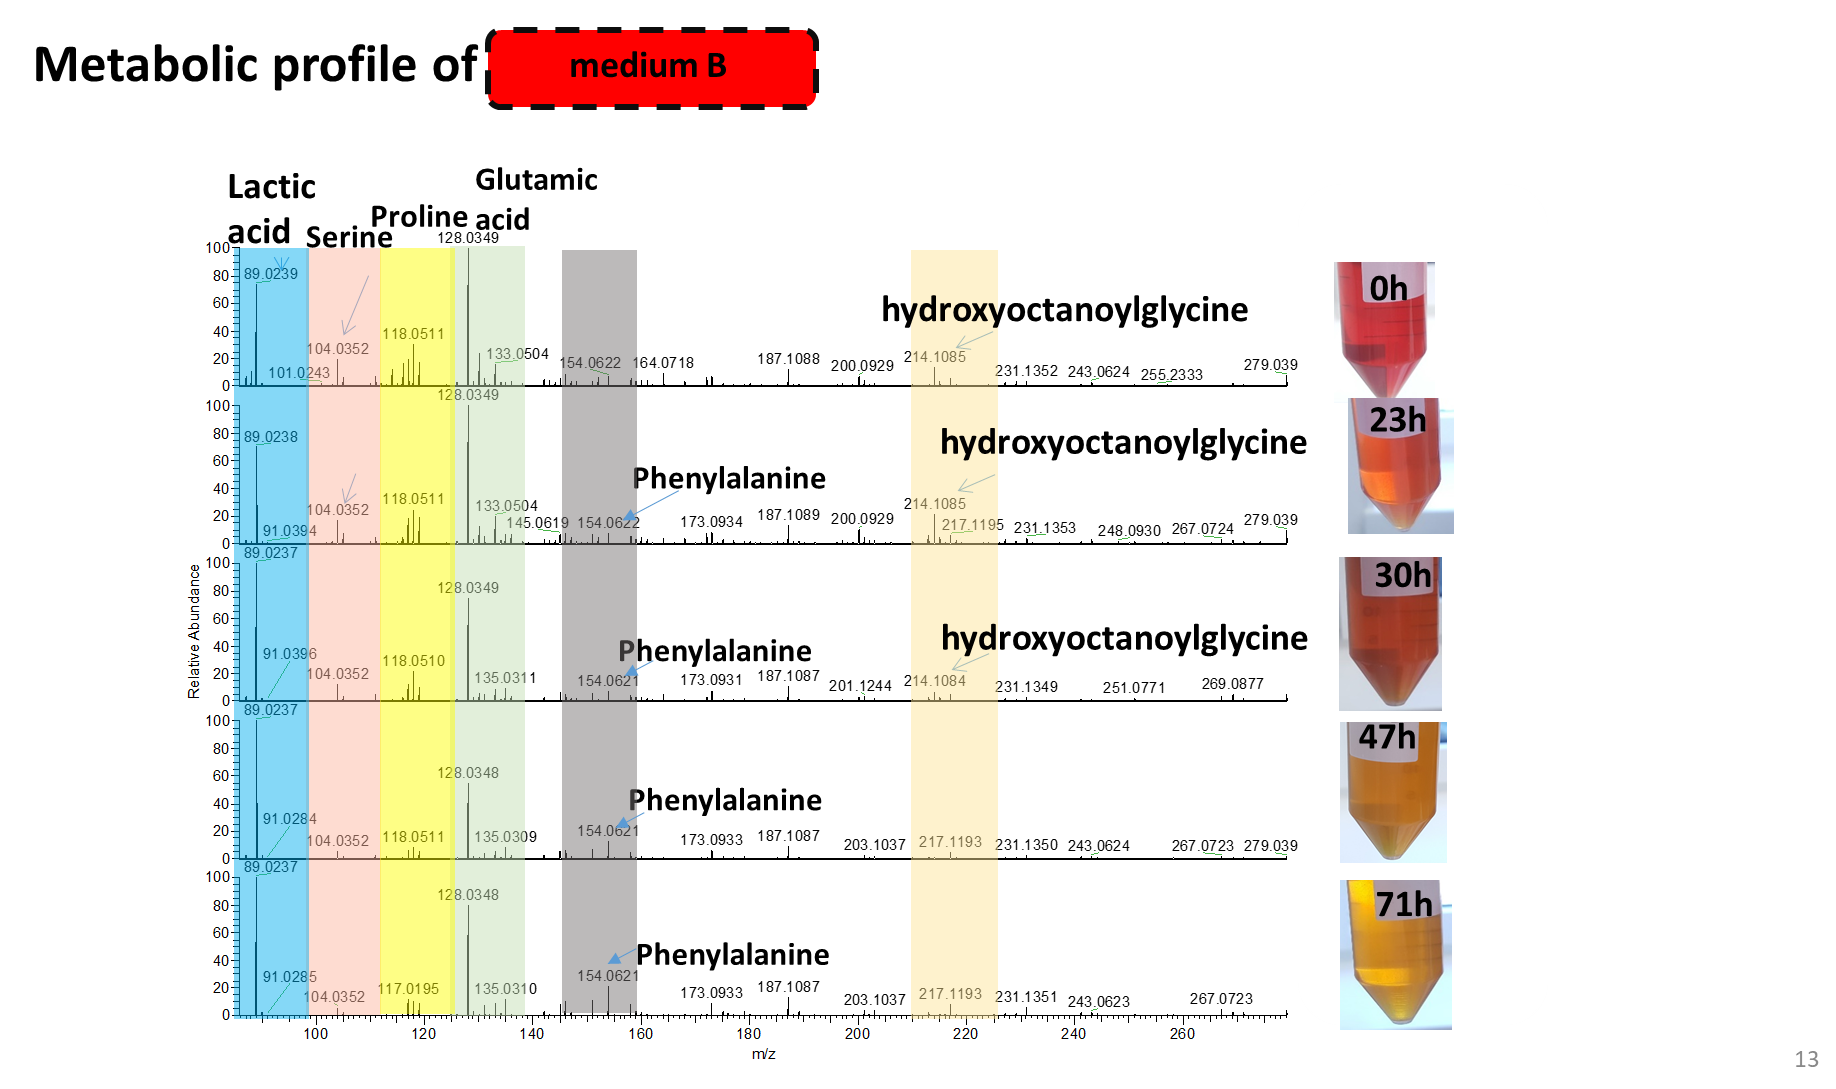
**

**Figure S2. Representative pectra showing the changes of metabolic fingerprinting of *M. gallisepticum* growing in medium B within 71 hours. Negative ion mode data.**


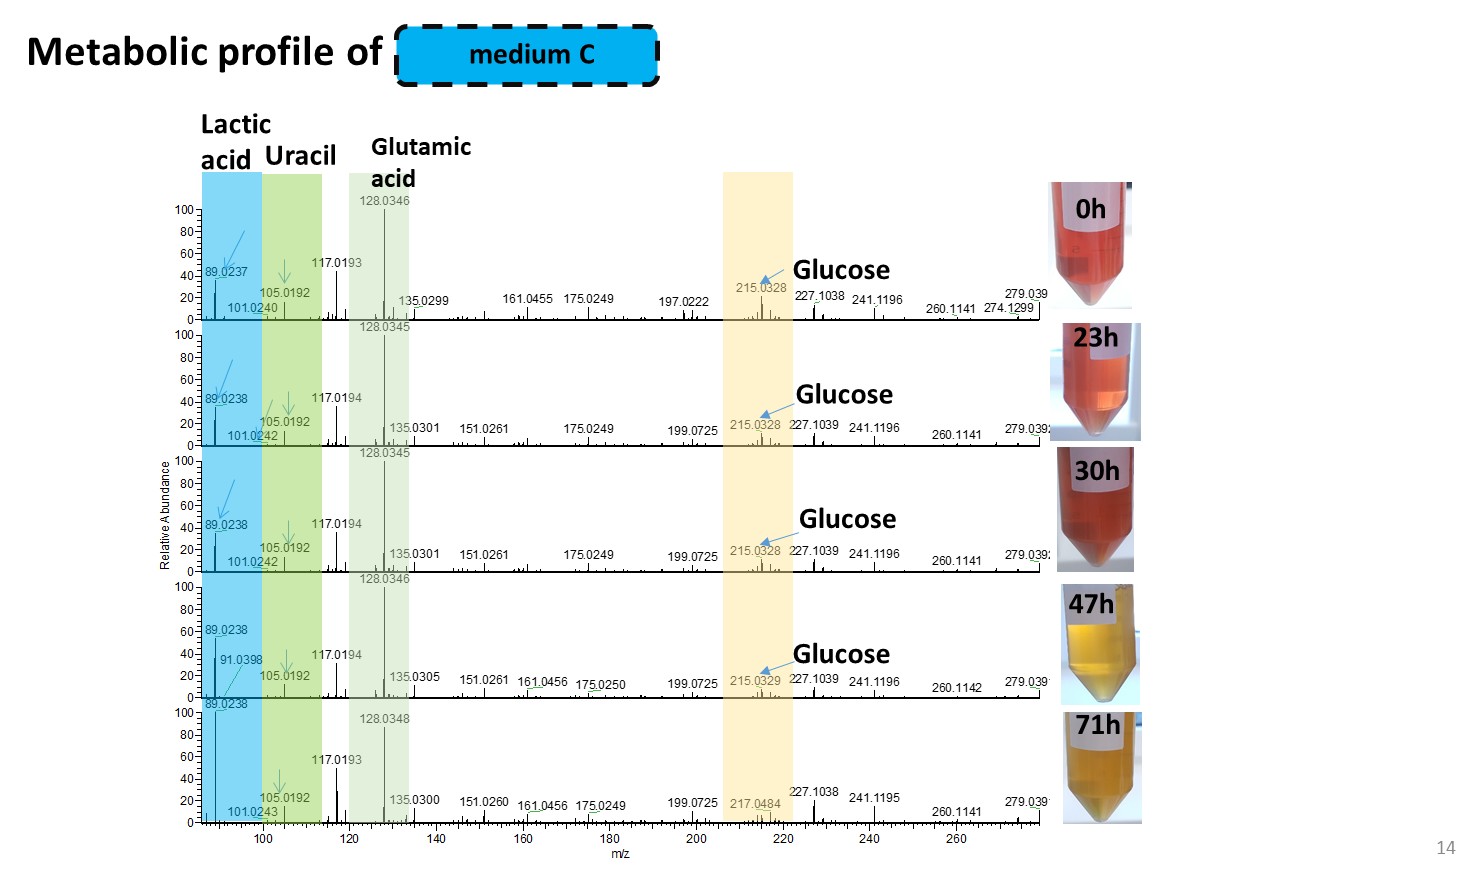


**Figure S3. Representative spectra showing the changes of metabolic fingerprinting of *M. gallisepticum* growing in medium C within 71 hours. Negative ion mode data.**


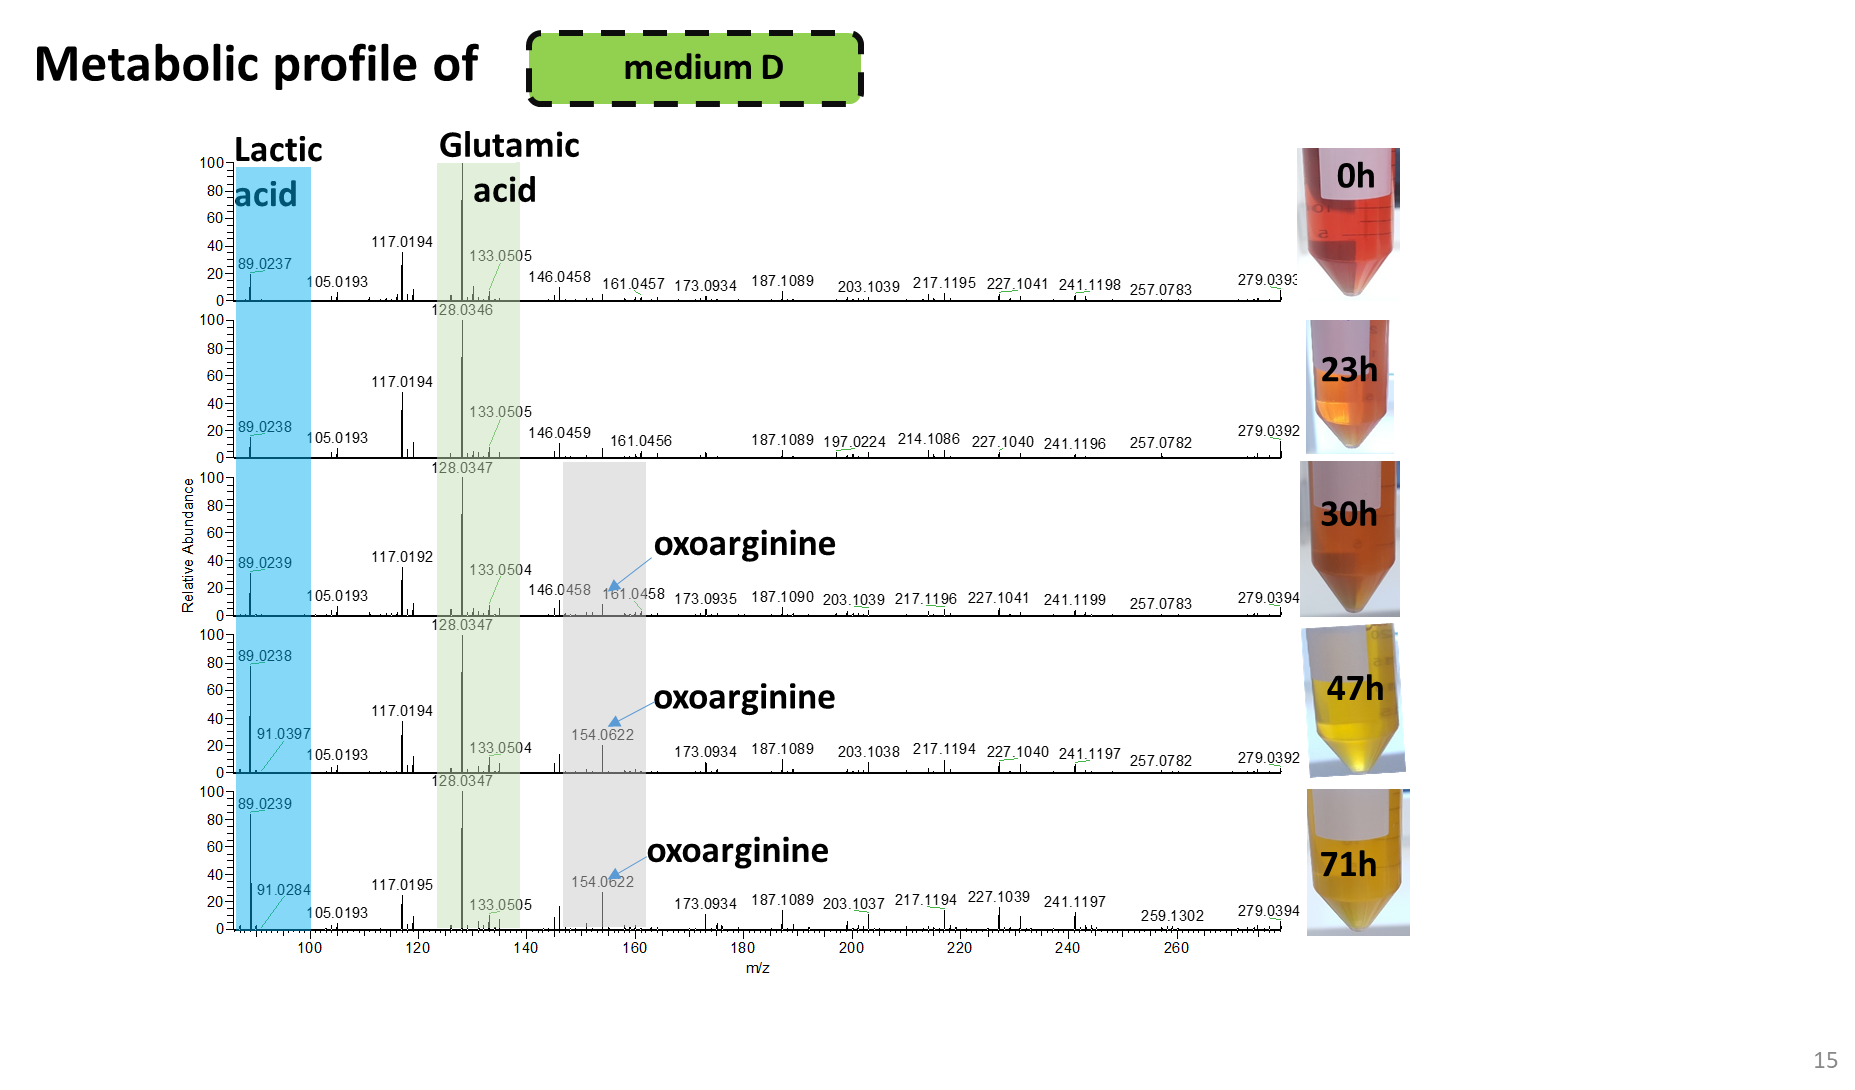


**Figure S4. Representative spectra showing the changes of metabolic fingerprinting of *M. gallisepticum* growing in medium D within 71 hours. Negative ion mode data.**


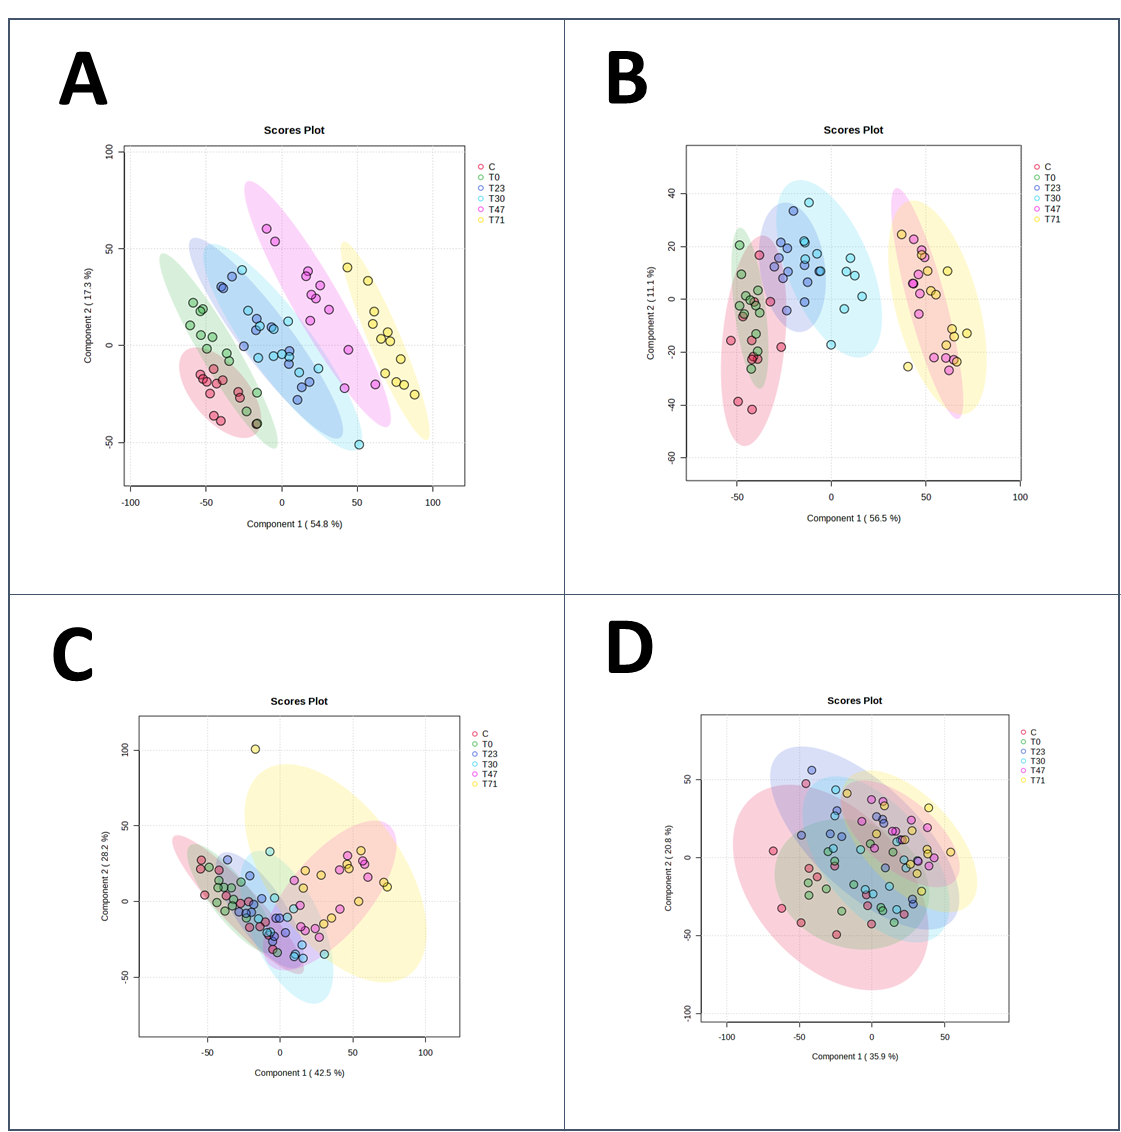


**Figure S5. PLS-DA scores plot showing the changes of metabolic fingerprinting of M. gallisepticum growing in four different media within 71 hours. Positive ion mode data.**

**
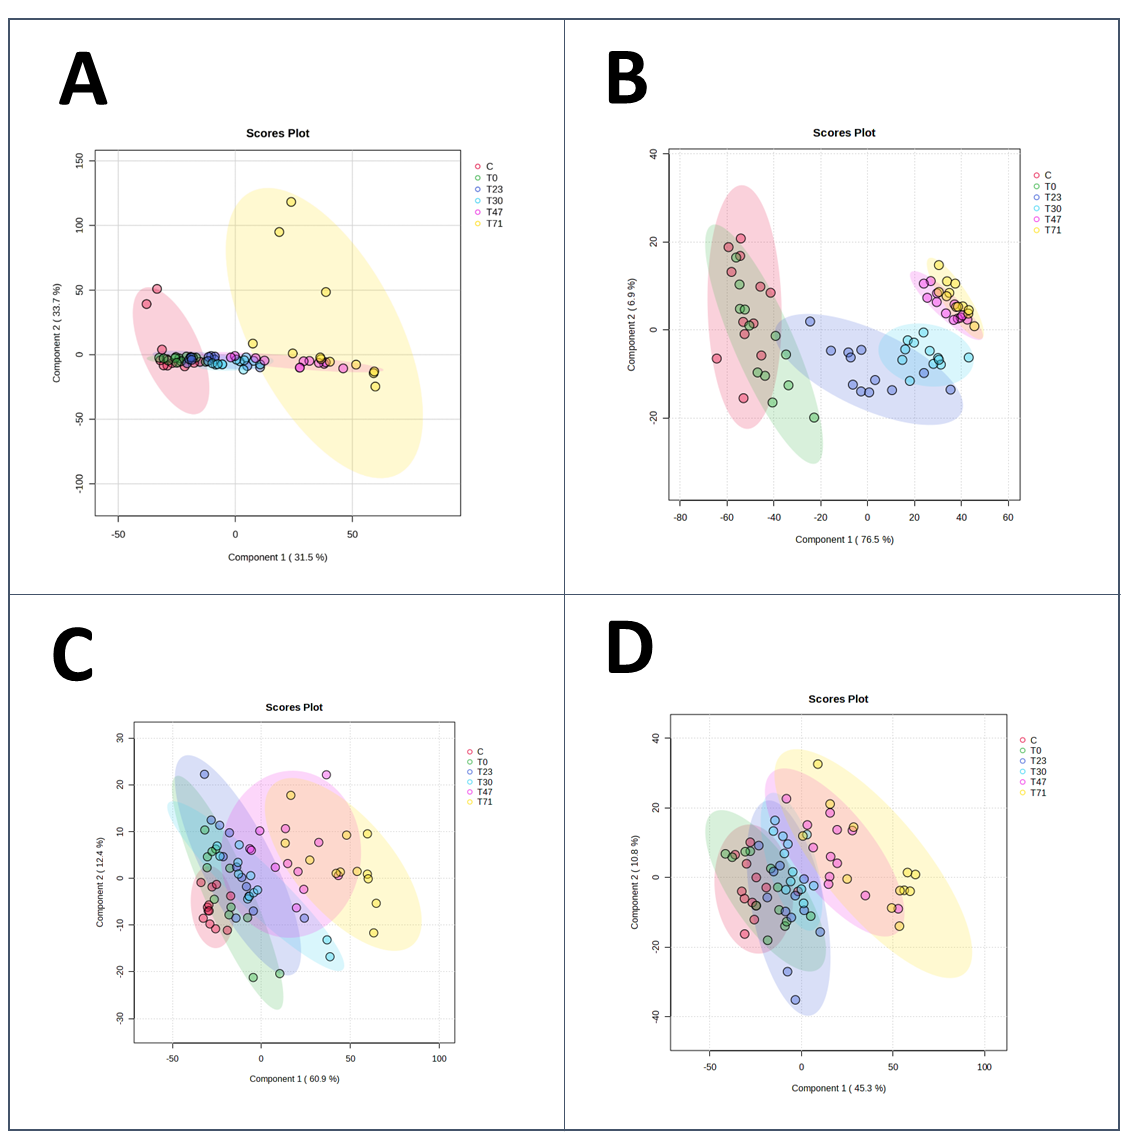
**

**Figure S5 PLS-DA scores plot showing the changes of metabolic fingerprinting of *M. gallisepticum* growing in four different media within 71 hours. Negative ion mode data.**
